# Supplementary material for: Tumor Necrosis Factor dynamically regulates the mRNA stabilome in rheumatoid arthritis fibroblast-like synoviocytes
Source: PubMed Central journal article supplement (PMC5510804; doi:10.1371/journal.pone.0179762), 2017-07-14
Supplement: pone.0179762.s001.pdf [file pone.0179762.s001.pdf]

| Condition       | GAPDH   |         |         |         |         |         |         |
|-----------------|---------|---------|---------|---------|---------|---------|---------|
|                 | Donor 1 | Donor 2 | Donor 3 | Donor 4 | Donor 5 | Donor 6 | Donor 7 |
| Control         | 18.81   | 18.16   | 17.89   | 19.63   | 18.37   | 18.00   | 17.50   |
| Control ActD 1h | 18.62   | 18.29   | 17.90   | 19.91   | 18.31   | 18.00   | 17.60   |
| Control ActD 3h | 18.60   | 18.05   | 17.79   | 18.90   | 18.30   | 18.10   | 17.70   |
| TNF 1h          | 19.71   | 18.50   | 18.06   | 19.96   | 18.93   | 18.10   | 17.60   |
| TNF 1h ActD 1h  | 20.29   | 19.11   | 18.60   | 19.17   | 19.58   | 18.10   | 17.70   |
| TNF 1h ActD 3h  | 19.53   | 19.37   | 18.77   | 18.43   | 19.64   | 18.20   | 17.80   |
| TNF 3h          | 20.57   | 18.93   | 18.70   | 18.39   | 19.31   | 18.00   | 17.80   |
| TNF 3h ActD 1h  | 19.37   | 18.44   | 18.34   | 18.51   | 19.52   | 18.20   | 17.80   |
| TNF 3h ActD 3h  | 18.60   | 18.45   | 17.94   | 19.21   | 18.67   | 18.20   | 17.90   |
| TNF 24h         | 18.90   | 18.53   | 17.50   | 18.75   | 19.21   | 18.00   | 17.50   |
| TNF 24h ActD 1h | 18.85   | 18.91   | 17.42   | 18.39   | 19.45   | 18.00   | 17.70   |
| TNF 24h ActD 3h | 19.62   | 18.97   | 18.74   | 19.63   | 19.69   | 18.10   | 17.90   |
| TNF 72h         | 19.61   | 18.61   | 18.38   | 19.69   | 19.21   | 18.30   | 17.50   |
| TNF 72h ActD 1h | 19.39   | 18.15   | 18.47   | 19.56   | 18.83   | 18.20   | 17.70   |
| TNF 72h ActD 3h | 19.76   | 18.08   | 17.97   | 20.34   | 18.87   | 18.30   | 17.90   |

**S1 Table: Expression levels and stability of GAPDH mRNA do not change by TNF stimulation.**

Expression levels provided in units of average cycle thresholds (Ct Values). For each condition and donor, average taken from n=3 replicates.
