# Supplementary material for: Tumor Necrosis Factor dynamically regulates the mRNA stabilome in rheumatoid arthritis fibroblast-like synoviocytes
Source: PubMed Central journal article supplement (PMC5510804; doi:10.1371/journal.pone.0179762), 2017-07-14

**a**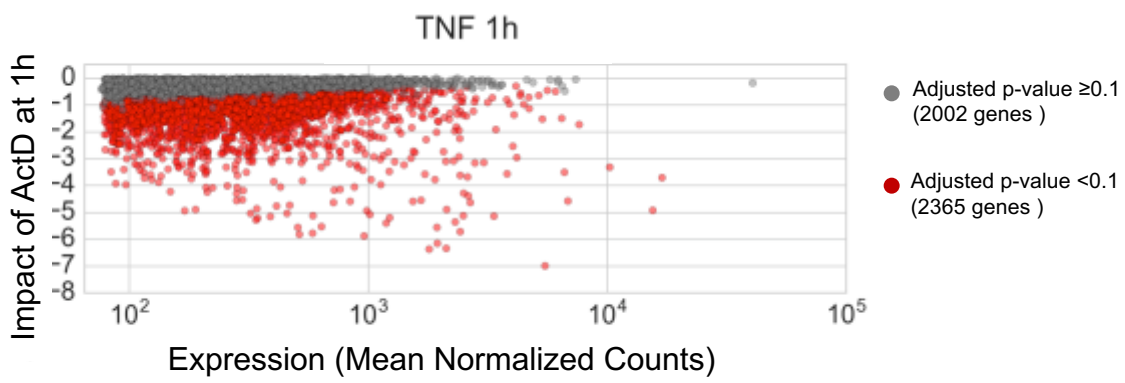**b**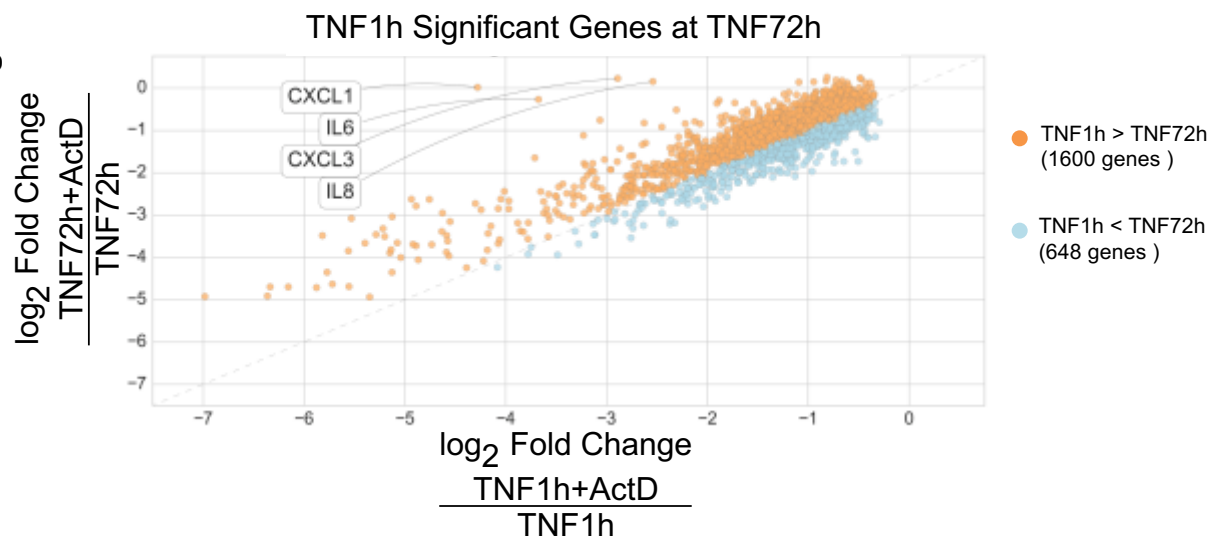

Supplement: pone.0179762.s003.pdf [file pone.0179762.s003.pdf]
