# Supplementary material for: Tumor Necrosis Factor dynamically regulates the mRNA stabilome in rheumatoid arthritis fibroblast-like synoviocytes
Source: PubMed Central journal article supplement (PMC5510804; doi:10.1371/journal.pone.0179762), 2017-07-14
Supplement: pone.0179762.s005.pdf [file pone.0179762.s005.pdf]

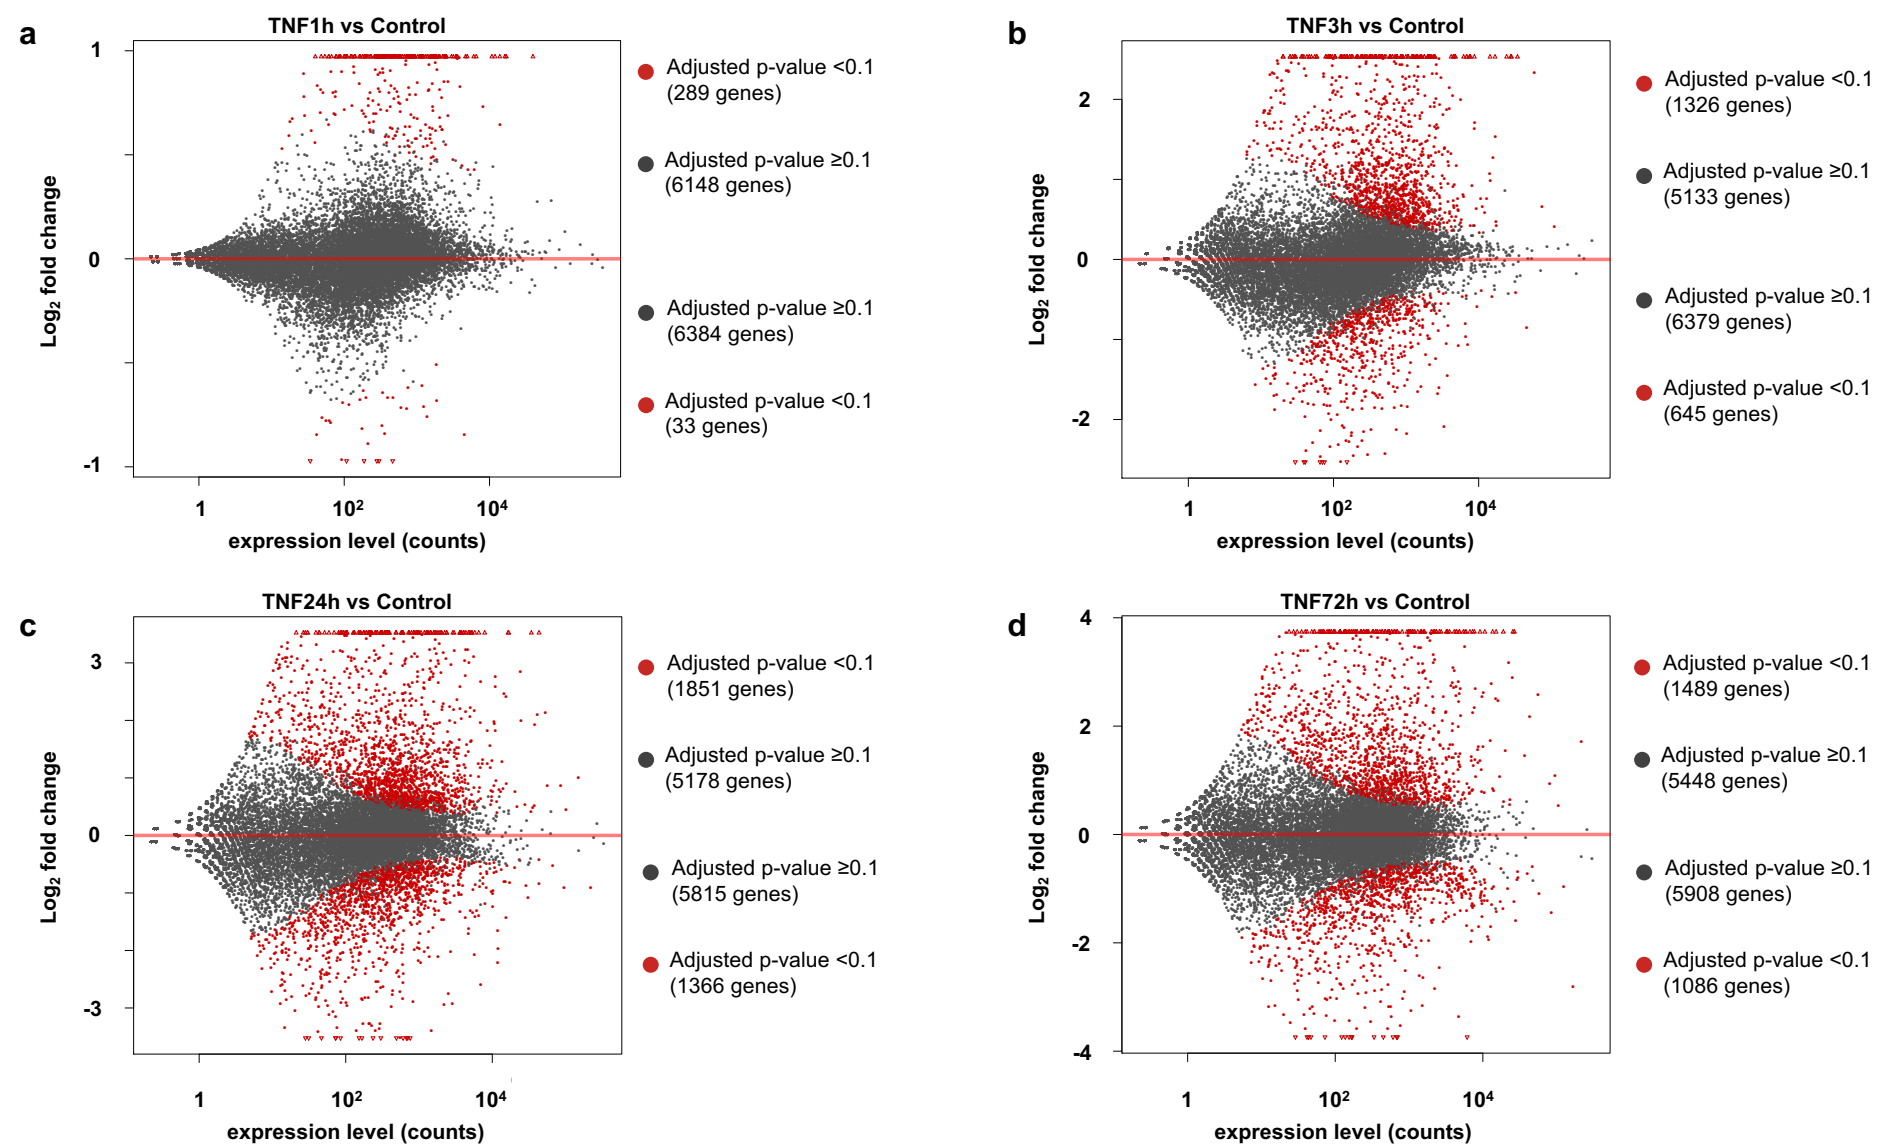

S4 Fig
